# Supplementary material for: Reaction of gold(iii) oxo complexes with alkenes. Synthesis of unprecedented gold alkene complexes, [Au(N,N)(alkene)][PF6]. Crystal structure of [Au(bipyip)(η2-CH2CHPh)][PF6] (bipyip= 6-isopropyl-2,2′-bipyridine)
Source: Royal Society of Chemistry journal article supplement (doi:10.1039/b404890c), 2004-01-01
Supplement: b404890c.doc [file b404890c.doc]

**Reaction of gold(III) oxo complexes with alkenes. Synthesis of unprecedented gold alkene complexes, [Au(N,N)(alkene)][PF6]. Crystal structure of [Au(bipyip)(2-CH2=CHPh)][PF6] (bipyip = 6-*iso*-propyl-2,2’-bipyridine).**

Maria A. Cinellu, Giovanni Minghetti, Sergio Stoccoro,Antonio Zuccaand Mario Manassero

**Supplementary data**

**General experimental details**

Compounds **1a**-**1d** were synthesized according to ref. 1c. Styrene was obtained from Aldrich Chimica and filtered through basic Al2O3 prior to use. Solvents were distilled prior to use. Elemental analyses were performed with a Perkin-Elmer Elemental Analyzer 240B by Mr. A. Canu (Dipartimento di Chimica, Università di Sassari). Conductivities were measured with a Philips PW 9505 conductimeter. Infrared spectra with a Perkin-Elmer 1310 spectrophotometer using Nujol mulls, 1H and 13C{1H} NMR spectra with a Varian VXR 300 spectrometer operating at 300.0 and 75.4 MHz, respectively; chemical shifts are given in ppm relative to internal tetramethylsilane. Mass spectra were recorded with a VG 7070 instrument operating under FAB conditions, with 3-nitrobenzyl alcohol as supporting matrix.

Reactions of compounds **1a**-**1d** with styrene: *Anhydrous solvent*: Styrene (2 mmol) was added to a solution of **1** (0.2 mmol) in acetonitrile (40 cm3) (**1a** and **1b**) or acetone (40 cm3) (**1c** and **1d**). The resulting yellow solution was stirred for 3 days at room temperature and then filtered through Celite. The solution was evaporated to dryness and the residue extracted with CHCl3 (3 x 15 cm3). The combined chloroform extracts were filtered and concentrated to a small volume. Addition of diethyl ether gave a whitish precipitate of compound **2** (**2a**, 15 %; **2b**, 20 %; **2c** 25 %; **2d**, 45 %). Unreacted complex **1** was recovered from the insoluble residue (**1a**, 66 %; **2a**, 61 %; **1c**, 50 %; **1d**, 30 %).

*Aqueous solvent*: To a solution of **1a** (0.320 g, 0.3 mmol) in acetonitrile (50 cm3) styrene (6 mmol) and water (5 cm3) were added. The resulting solution was stirred under Ar for 7 days at room temperature. Concentration of the filtered solution gave a white precipitate of **2a** which was recovered by filtration under vacuum. Recrystallization from dichloromethane gave the analytical sample (0.130 g, 35 %). Compounds **2c** and **2d** were obtained similarly from **1c** and **1d**, respectively. At variance with **2a**, **2c** and **2d** were extracted with CHCl3 (3 x 15 cm3) after evaporation to dryness of the filtered solution. (**2c**, 31 %; **2d**, 46 %).

**2a** mp 136 °C (decomp.). Anal. Calcd for C19H18AuF6N2P: C, 37.02; H, 2.94; N, 4.55 %. Found C, 37.39; H, 2.74; N, 4.64 %. M (5 x 10-4 mol dm-3, Me2CO) 120 -1cm2mol-1. Selected IR bands: (/cm-1, nujol mull): 1600 s, 1565 m, 1223 m, 1030 m, 848 vs (br), 785 s, 700 m. 1H NMR (CD2Cl2, 293 K):  2.85 (s, 3, Me), 4.09 (dd, *J*ab = 2.1, *J*ac = 9.0 Hz, 1, Ha), 4.16 (dd, *J*ba = 2.1, *J*bc = 13.5 Hz, 1, Hb), 5.41 (dd, *J*ca = 9.0, *J*cb = 13.5 Hz, 1, Hc), 7.33-8.44 (m, 11, Ar-H), 8.57 (d, broad, 1 H, H6' bipy); (CD3CN, 293 K):  2.80 (s, 3, Me), 4.06 (dd, *J*ab = 2.0, *J*ac = 9.1 Hz, 1, Ha), 4.20 (dd, *J*ba = 2.0, *J*bc = 13.5 Hz, 1, Hb), 5.44 (dd, *J*ca = 9.1, *J*cb = 13.5 Hz, 1, Hc), 7.32-8.46 (m, 11, Ar-H), 8.60 (d, broad, 1, H6' bipy); 13C{1H} NMR (CD3CN):  27.54 (Me), 54.73, (CH=*C*H2), 80.94 (*C*H=CH2), 121.50, 123.87, 125.13, 127.46, 128.44, 129.43, 129.95, 138.02, 142.68, 143.20, 151.98, 153.71, 169.15. Mass Spectrum (FAB+) *m*/*z*: 471 *M*+, 367 [*M* - PhCH=CH2]

**2b** mp 140-141 °C. Calcd for C20H20AuF6N2P: C, 38.11; H, 3.20; N, 4.45 %. Found C, 37.95; H, 3.08; N, 4.48 %. M (5 x 10-4 mol dm-3, Me2CO) 132 -1cm2mol-1. Selected IR bands: (/cm-1, nujol mull): 1595 s, 1568 m, 1227 m, 1027 m, 842 vs (br), 777 s, 698 m. 1H NMR (acetone-*d*6, 293 K):  1.36 (t, 3*J* = 7.7 Hz, 3, C*H*3CH2), 3.20 (dq, 2*J* = 11.2, 3*J* = 7.7 Hz, 2, CH3C*H*2), 4.23 (dd, *J*ab = 2.0, *J*ac = 9.1 Hz, 1, Ha), 4.40 (dd, *J*ba = 2.0, *J*bc = 13.7 Hz, 1, Hb), 5.64 (dd, *J*ca = 9.1, *J*cb = 13.7 Hz, 1, Hc), 7.33-8.79 (m, 11, Ar-H), 8.85 (d, 3*J* = 3.6 Hz, 1, H6').

**2c** mp 140-141 °C. Calcd for C21H22AuF6N2P: C, 39.14; H, 3.44; N, 4.35 %. Found C, 39.01; H, 3.38; N, 4.24 %. M (5 x 10-4 mol dm-3, Me2CO) 140 -1cm2mol-1. Selected IR bands: (/cm-1, nujol mull): 1595 s, 1567 m, 1226 m, 1028 m, 842 vs (br), 778 s, 701 m. 1H NMR (acetone-*d*6, 293 K): 1.18 (d, 3*J* = 6.8 Hz, 3, CH3), 1.51 (d, 3*J* = 6.8 Hz, 3, CH3), 3.55 (sept, 3*J* = 6.8 Hz, 1, CH), 4.24 (dd, *J*ab = 2.0, *J*ac = 9.0 Hz, 1, Ha), 4.41 (dd, *J*ba = 2.0, *J*bc = 13.6 Hz, 1, Hb), 5.64 (dd, *J*ca = 9.0, *J*cb = 13.6 Hz, 1, Hc), 7.31-8.82 (m, 11, Ar-H), 8.89 (d, 3*J* = 4.6 Hz, 1, H6'); 13C{1H} NMR (acetone-*d*6, 293 K):  22.43 (Me), 22.99 (Me), 41.83 (*C*HMe2), 55.64, (CH=*C*H2), 83.14 (*C*H=CH2), 122.58, 124.90, 125.26, 127.52, 128.55, 129.35, 129.85, 137.91, 142.78, 143.18, 152.15, 153.67, 169.04. Mass Spectrum (FAB+) *m*/*z*: 499 *M*+, 395 [*M* - PhCH=CH2]. Crystals suitable for X-ray diffraction were obtained by slow diffusion of diethyl ether into an acetonitrile solution.

The activation barrier for styrene rotation in **2c** was calculated using the following 1H NMR data (acetone-*d*6, 193 K): 0.73 (d, 3*J* = 6.7 Hz, 3, CH3(A)), 1.42 (d, 3*J* = 7.0 Hz, 3, CH3(B)), 1.46 (d, 3*J* = 6.7 Hz, 3, CH3(A)), 1.51 (d, 3*J* = 6.7 Hz, 3, CH3(B)), 3.10 (m, broad, 1, CH(A)), 3.65 (m, broad, 1, CH(B)), 4.03 (d, *J*ac = 8.3 Hz, 1, Ha(B)), 4.19 (d, *J*ac = 8.8 Hz, 1, Ha(A)), 4.35 (d, *J*bc = 13.4 Hz, 1, Hb(A)), 4.49 (d, *J*bc = 13.3 Hz, 1, Hb(B)), 5.48 (dd, *J*ca = 8.8, *J*cb = 13.4 Hz, 1, Hc(A)), 5.60 (dd, *J*ca = 8.3, *J*cb = 13.3 Hz, 1, Hc(B)), 7.27-9.03 (m, 24, Ar-H (A) + Ar-H(B)) (A:B = 1:1.3). Coalescence of the styrene CH peaks at  5.48 and 5.60 ( = 36 Hz, Tc = 243 K) corresponds to an activation barrier G‡ = 50.3 kJ.mol-1 at 243 K.

**2d** mp 158-159 °C. Calcd for C23H26AuF6N2P: C, 41.08; H, 3.90; N, 4.17 %. Found C, 40.96; H, 3.87; N, 4.14 %. M (5 x 10-4 mol dm-3, Me2CO) 135 -1cm2mol-1. Selected IR bands: (/cm-1, nujol mull): 1604 s, 1567 m, 1226 s, 1023 m, 846 vs (br), 778 s, 696 m. 1H NMR (CDCl3): 1.03 (s, 9, 3 Me), 3.13 (d, *J*AB = 12.8 Hz, 1, C*H*AHB), 3.24 (d, *J*AB = 12.8 Hz, 1, CHA*H*B), 4.03 (dd, *J*ab = 2.0, *J*ac = 9.0 Hz, 1, Ha), 4.08 (dd, *J*ba = 2.0, *J*bc = 13.4 Hz, 1, Hb), 5.43 (dd, *J*ca = 9.0, *J*cb = 13.4 Hz, 1, Hc),7.32-8.50 (m, 12, Ar-H). Mass Spectrum (FAB+) *m*/*z*: 527 *M*+, 423 [*M* - PhCH=CH2].

Reaction of compound **2d** with PPh3: Solid PPh3 (0.036 g, 0.136 mmol) was added to an acetone solution of **2d** (0.046 g, 0.068 mmol), addition of diethyl ether gave a white precipitate of [Au(PPh3)2][PF6] which was collected by filtration (0.055 g, 93 %). The mother liquor was evaporated to dryness and the residue extracted with diethyl ether. Evaporation of the solvent gave a colourless oil (0.0268 g) containing the free bipyridine ligand and styrene (1H NMR criterion).
